# Supplementary material for: Making CT Dose Monitoring Meaningful: Augmenting Dose with Imaging Quality
Source: MDPI journal article supplement (doi:10.3390/tomography9020065), 2023-04-07
Supplement: s1 [file s1]

Supplementary Materials:

Figure S1-Figure S14 show the evaluated charts in the observer study.

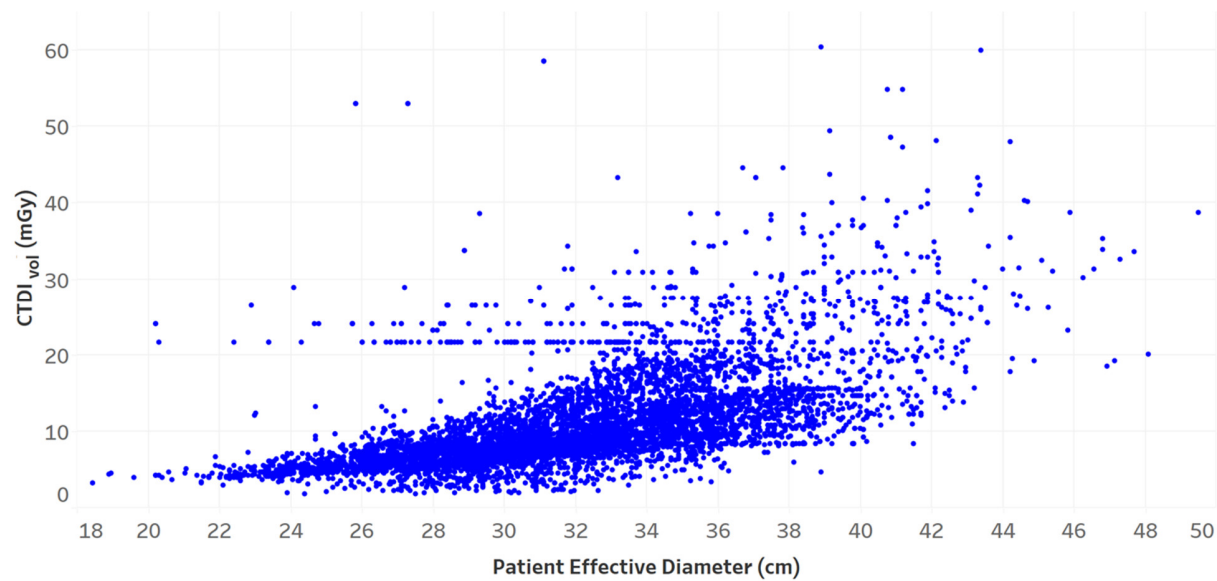

Figure S1. CTDI<sub>vol</sub> for patient effective diameter of all CT exams.

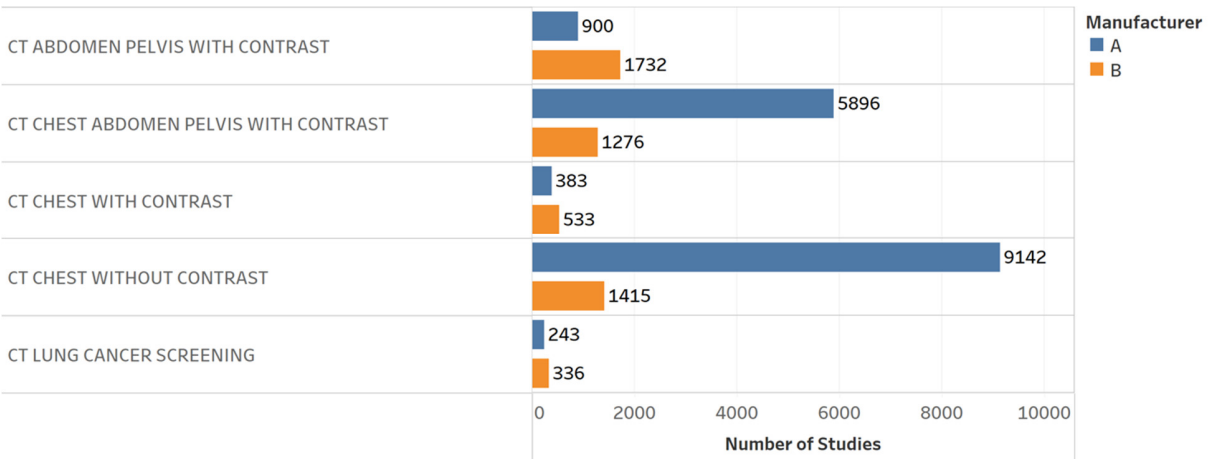

Figure S2. Distribution of CT exams by different protocols and manufacturers.

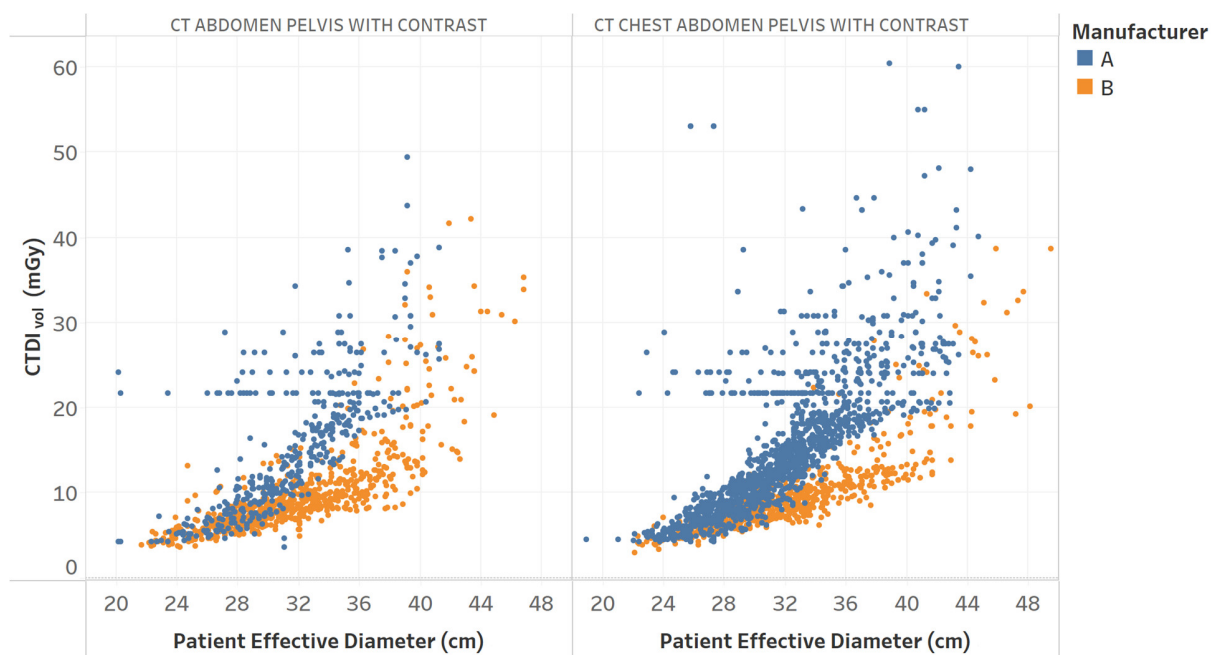

**Figure S3.** Distribution of the CTDI<sub>vol</sub> by different protocols, manufacturers, and patient effective diameter.

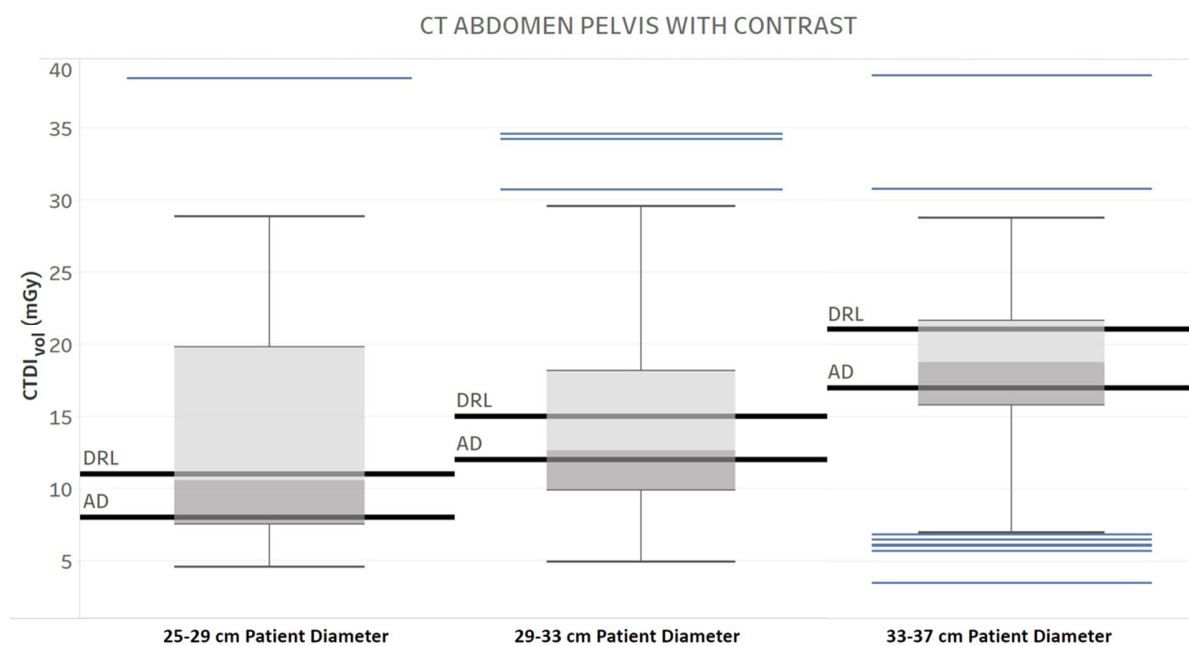

**Figure S4.** Diagnostic reference level (DRL) and achievable dose (AD) for three different patient diameter ranges, one protocol, and one manufacturer.

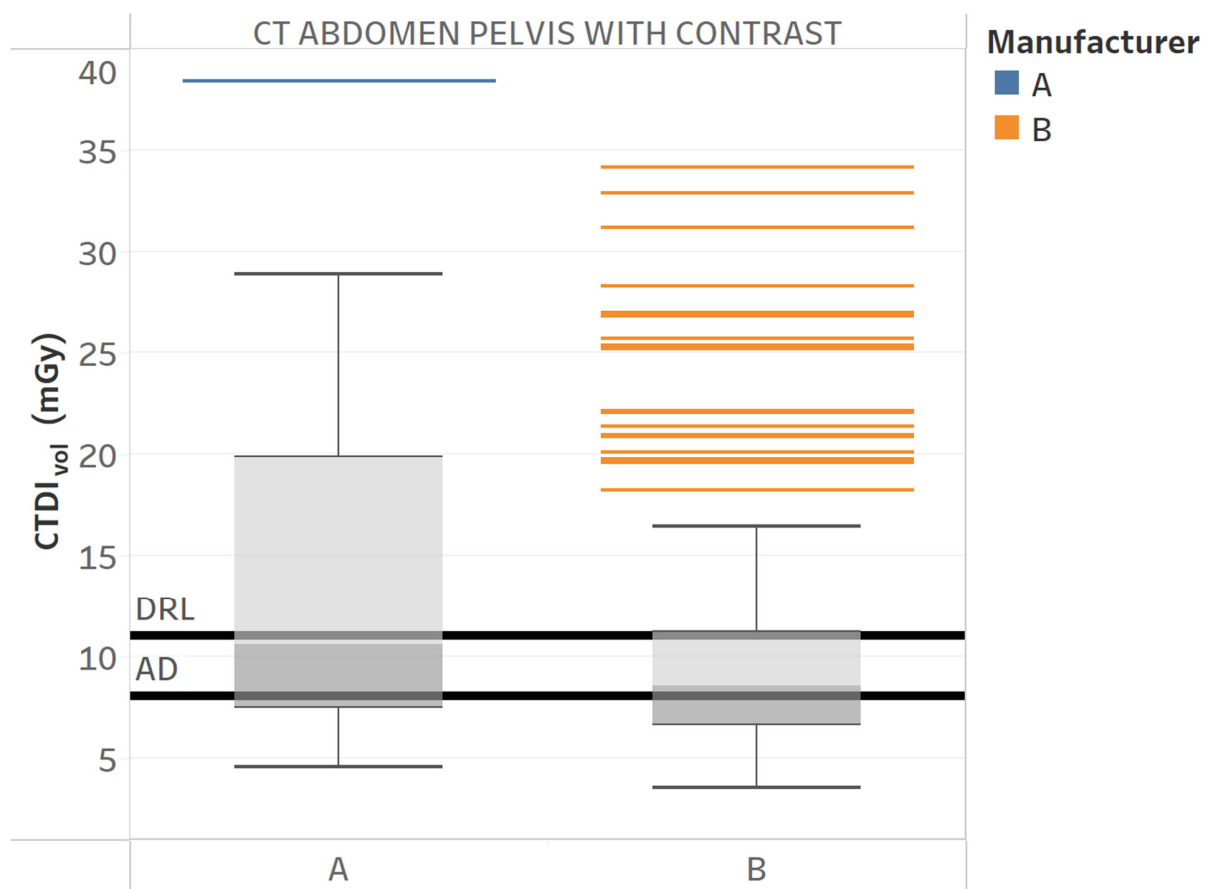

**Figure S5.** Diagnostic reference level (DRL) and achievable dose (AD) for one protocol and two manufacturers.

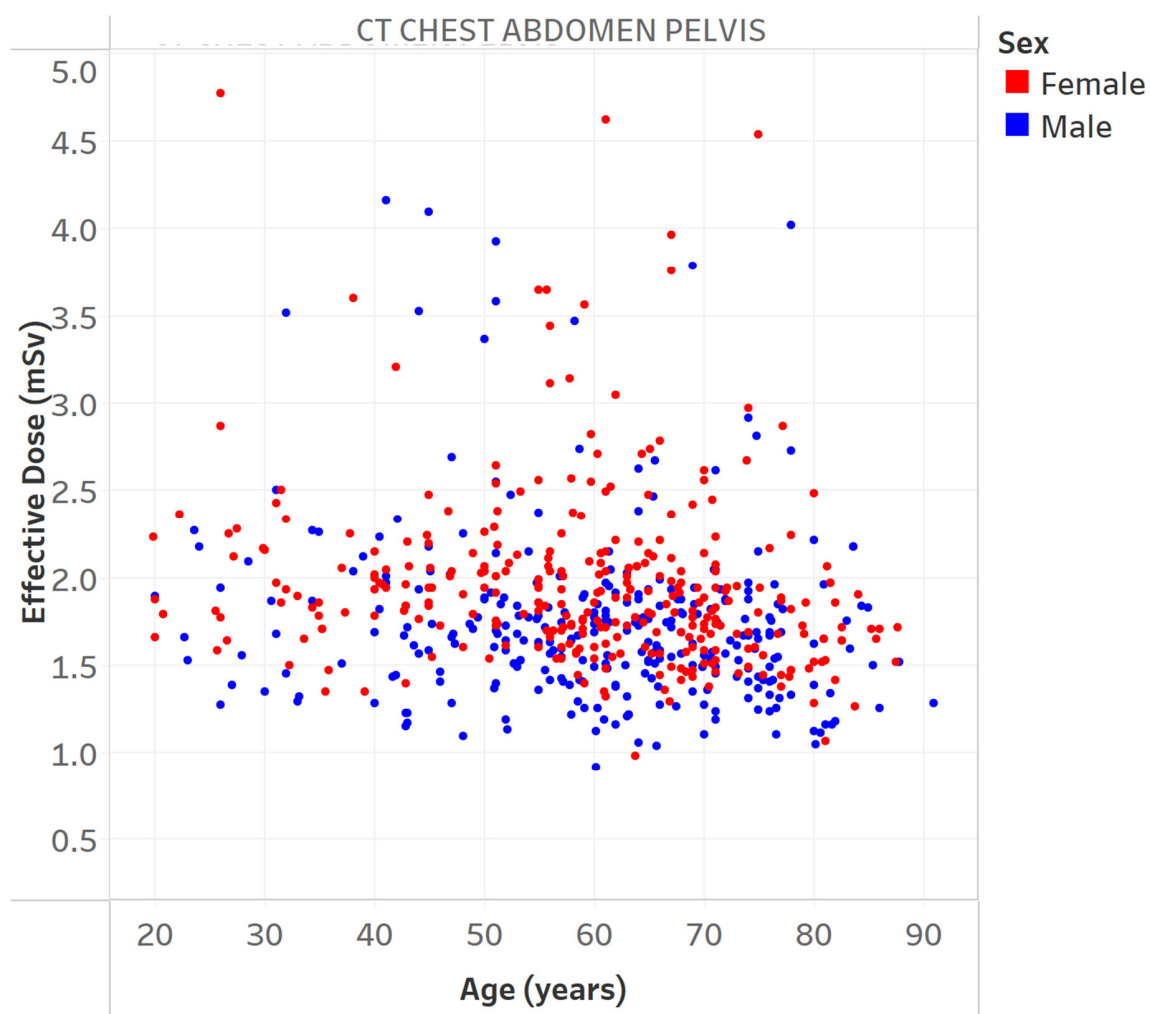

**Figure S6.** Effective Dose vs age for a specific protocol.

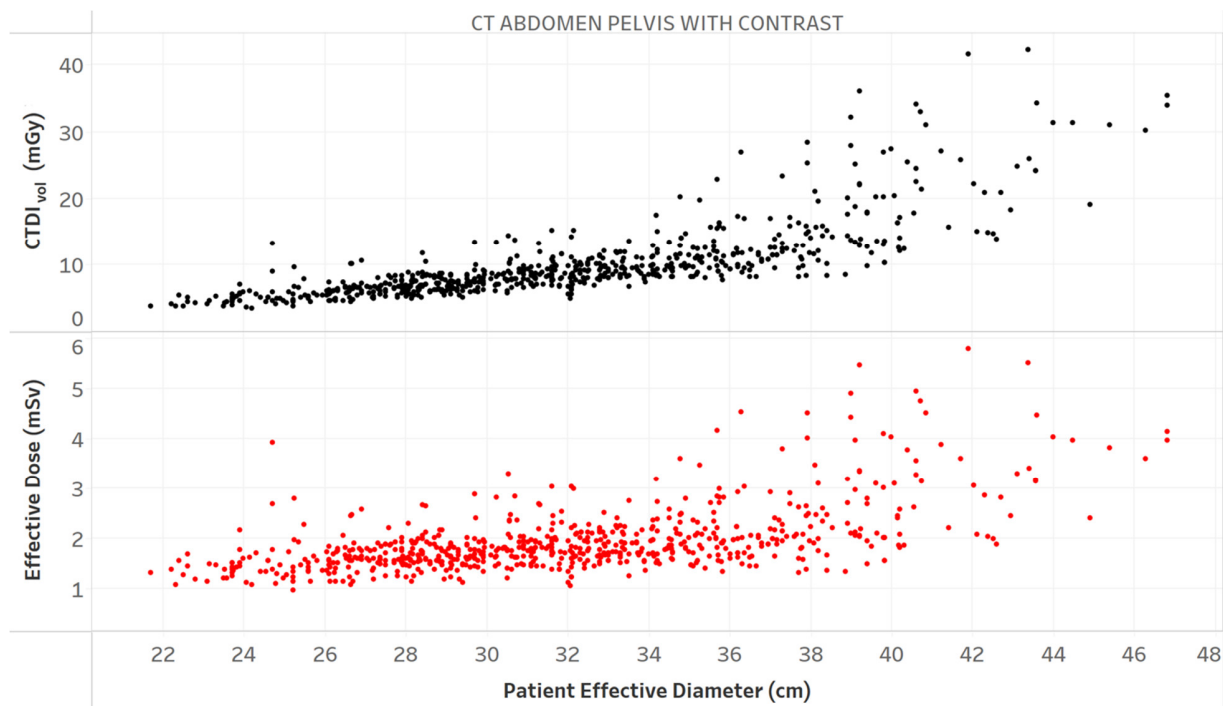

**Figure S7.** Distribution of the  $CTDI_{vol}$  and effective dose vs patient diameter for one protocol and one manufacturer.

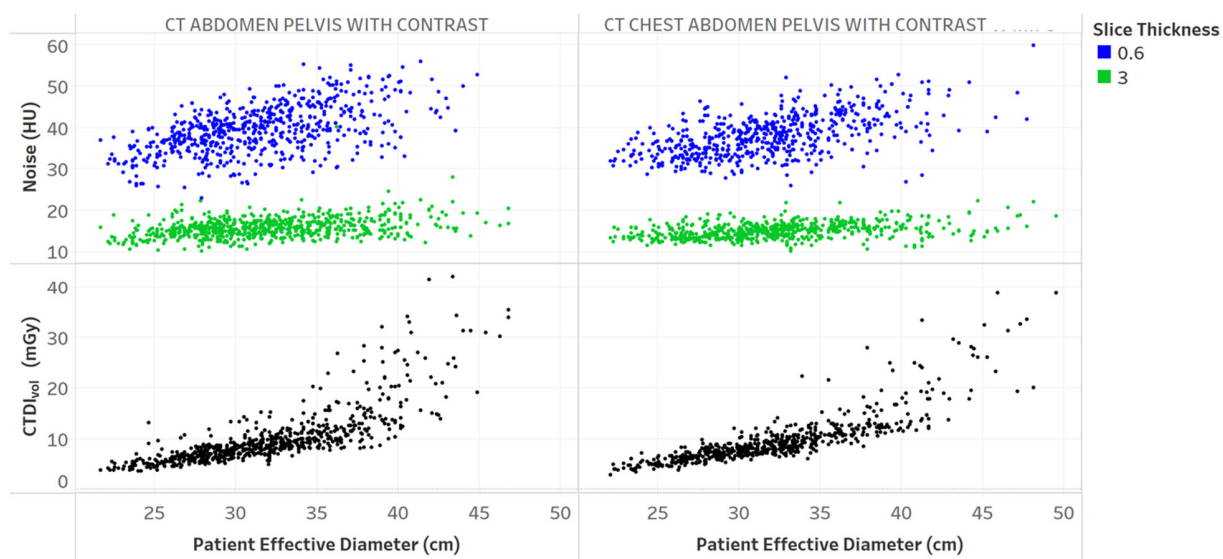

**Figure S8.** Distribution of noise and  $CTDI_{vol}$  vs patient diameter for one manufacturer across two different protocols. Images were reconstructed with two different slice thicknesses.

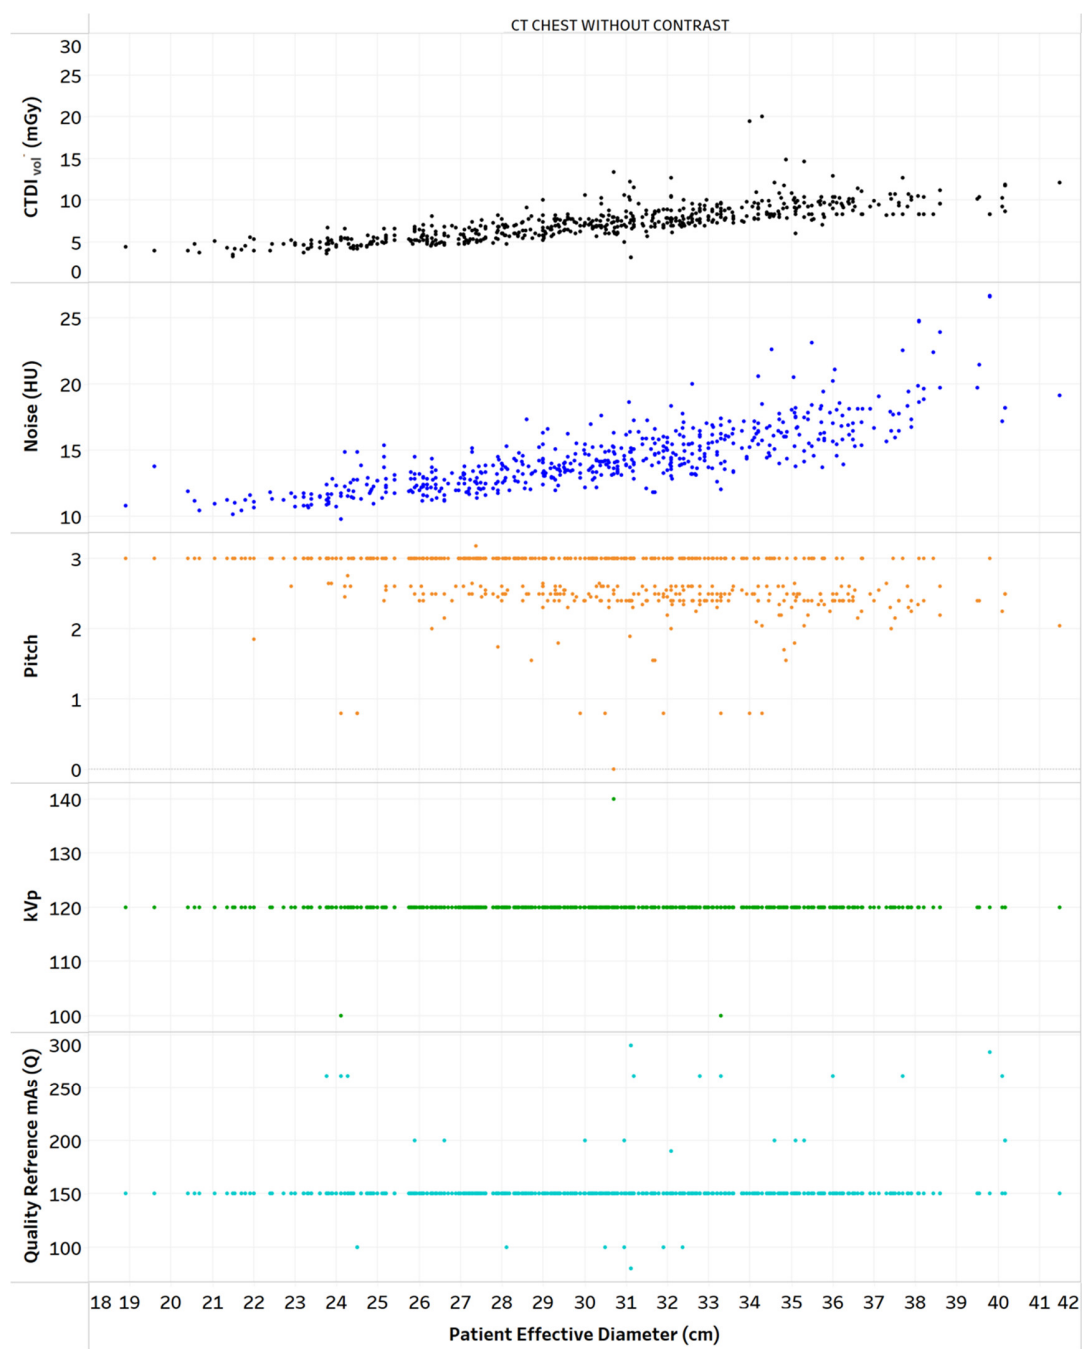

**Figure S9.** Distribution of CTDI<sub>vol</sub>, noise, and scanning parameters vs patient diameter for one protocol.

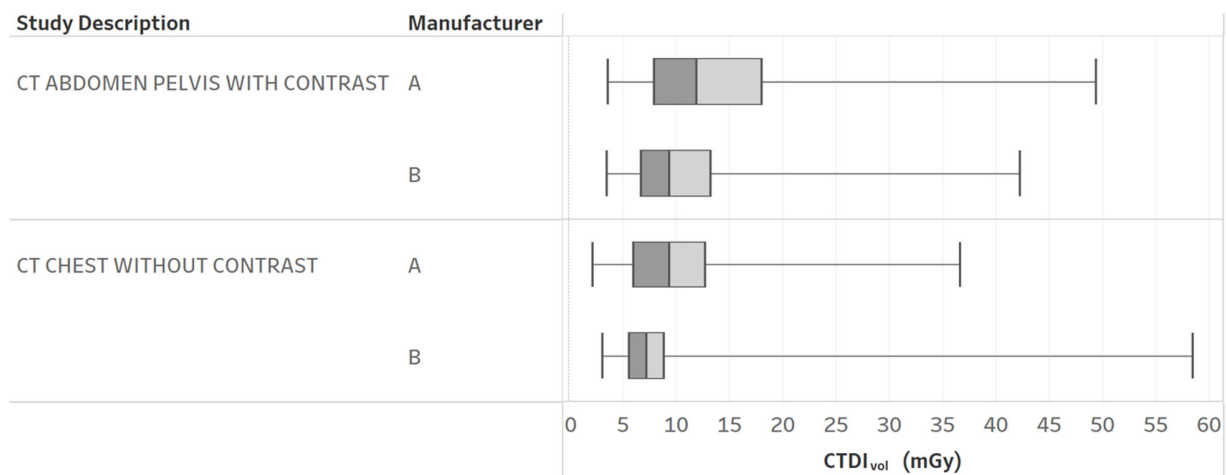

**Figure S10.** CTDI<sub>vol</sub> boxplots by different protocols and manufacturers.

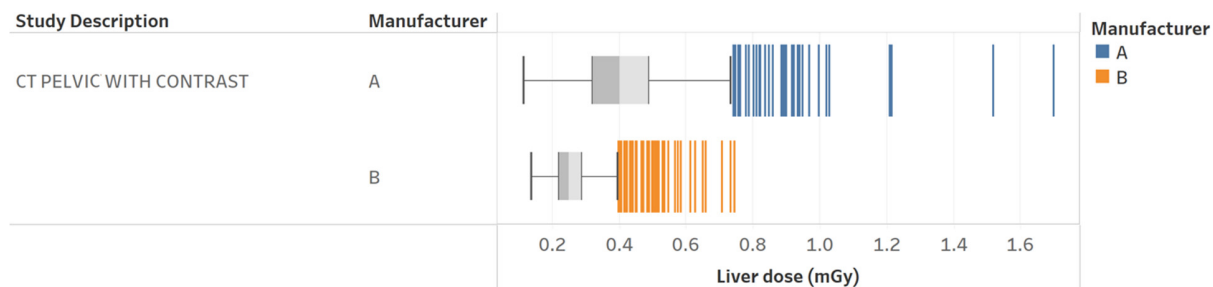

**Figure S11a.** Radiation dose to the liver for pelvic with contrast exams for two different scanners.

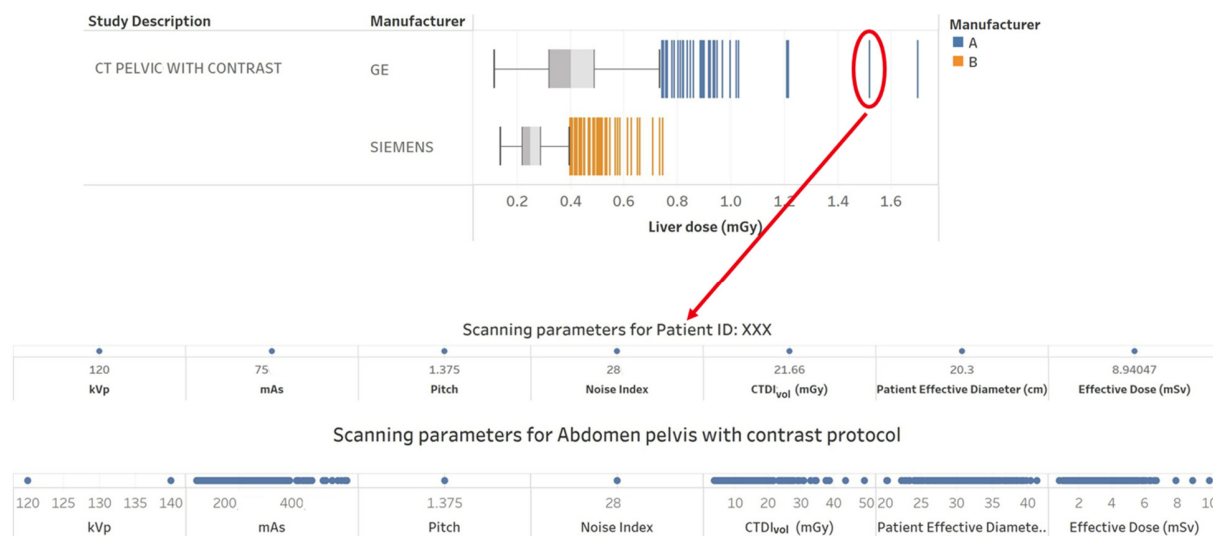

**Figure S11b.** Scanning parameters comparison between a specific patient (outlier) and the whole population.

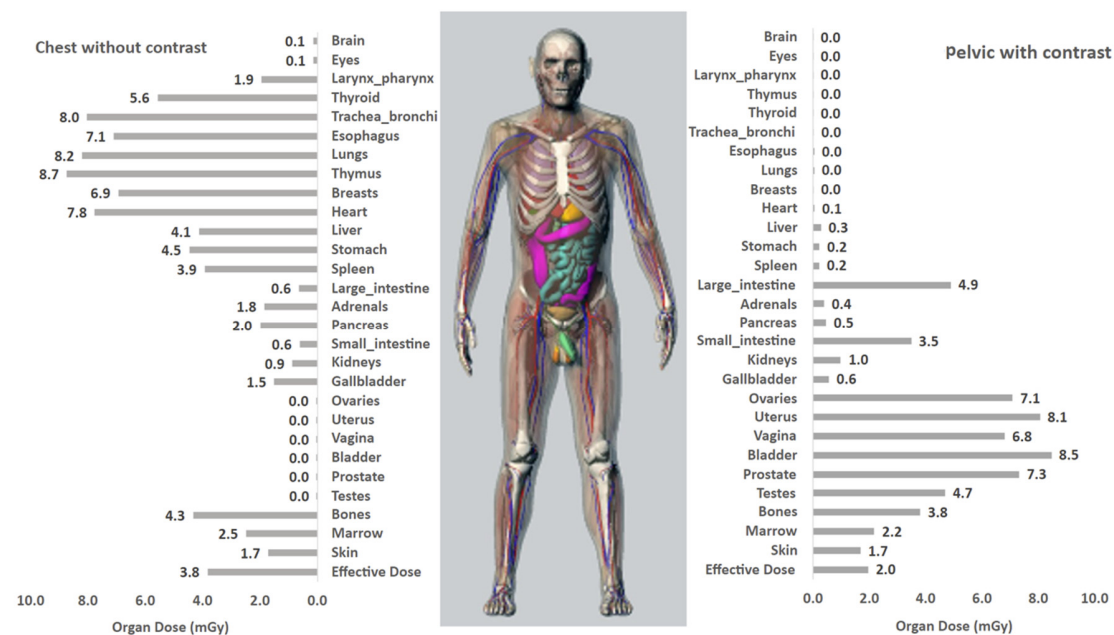

**Figure S12.** Median organ doses and effective dose for chest without contrast and pelvic with contrast exams.

Patient Diameter 29-32.9 cm

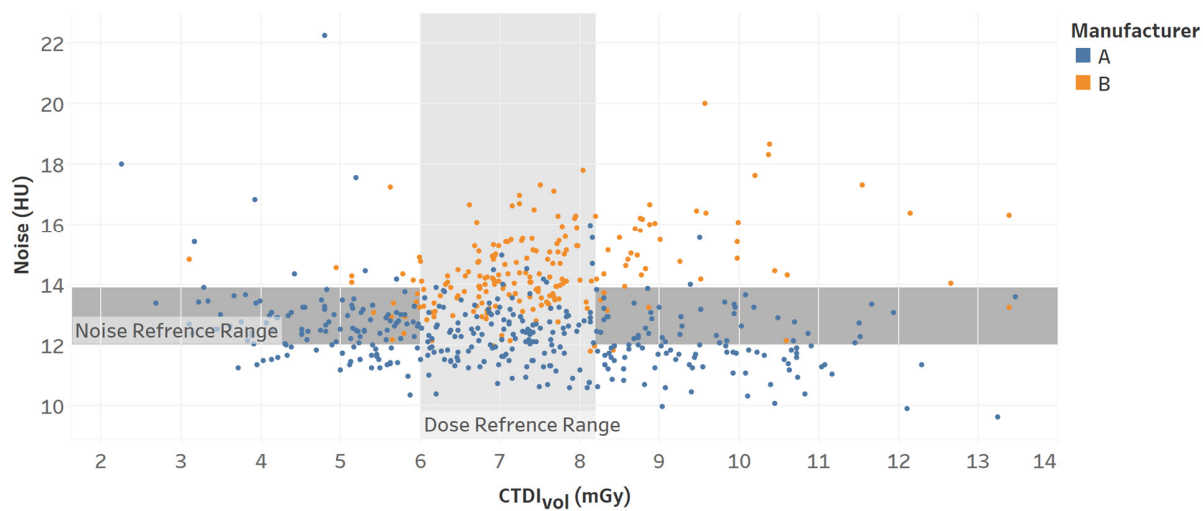

**Figure S13.** Noise and CTDI<sub>vol</sub> reference ranges (interquartile intervals) for a specific protocol.



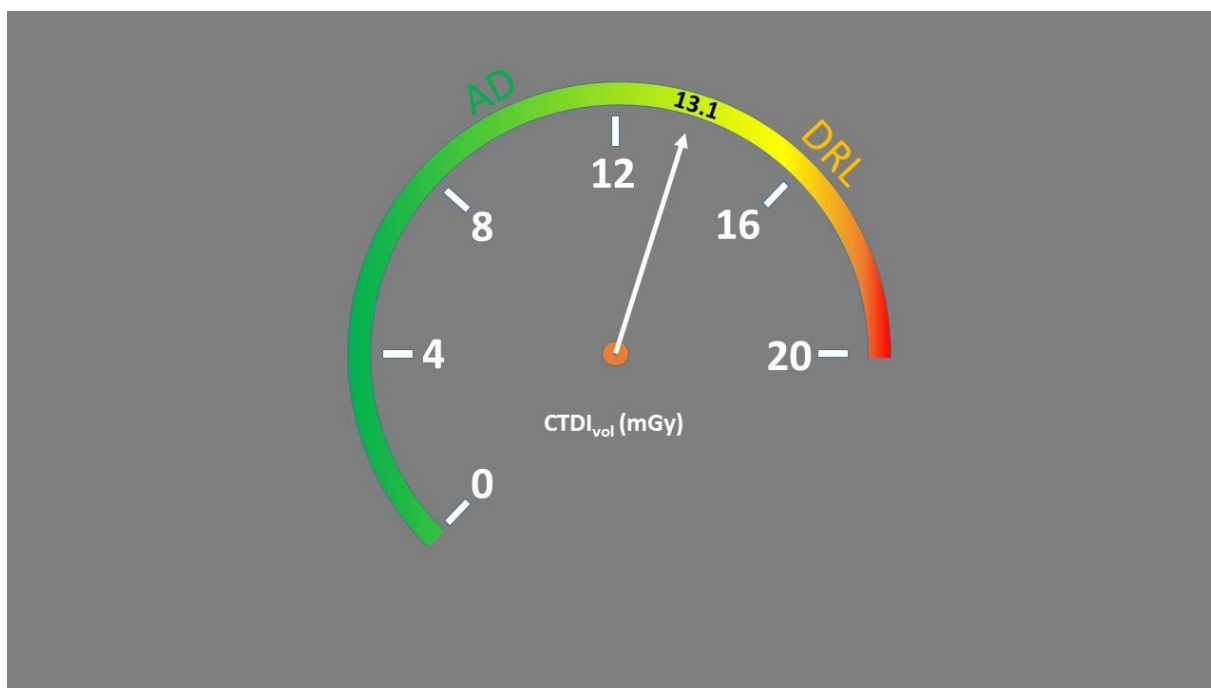

**Figure S14.** Comparison of institution average CTDI<sub>vol</sub> with achievable dose (AD) and diagnostic reference level (DRL) for one protocol.
